# Supplementary material for: Discovery of fragments inducing conformational effects in dynamic proteins using a second-harmonic generation biosensor
Source: Royal Society of Chemistry journal article supplement (doi:10.1039/d0ra09844b), 2021-01-01
Supplement: d0ra09844b1.pdf [file d0ra09844b1.pdf]

## Supplemental Information

### **Discovery of fragments inducing conformational effects in dynamic proteins using a second-harmonic generation biosensor**

Edward A. FitzGerald,<sup>1,2</sup> Margaret Butko,<sup>3</sup> Pierre Boronat,<sup>4</sup> Daniela Cederfelt,<sup>1</sup> Mia Abramsson,<sup>1</sup> Hildur Ludviksdottir,<sup>1</sup> Jacqueline E. van Muijlwijk-Koezen,<sup>4</sup> Iwan J.P. de Esch,<sup>4</sup> Doreen Dobritzsch,<sup>1</sup> Tracy Young,<sup>3</sup> and U. Helena Danielson.<sup>1,5,\*</sup>

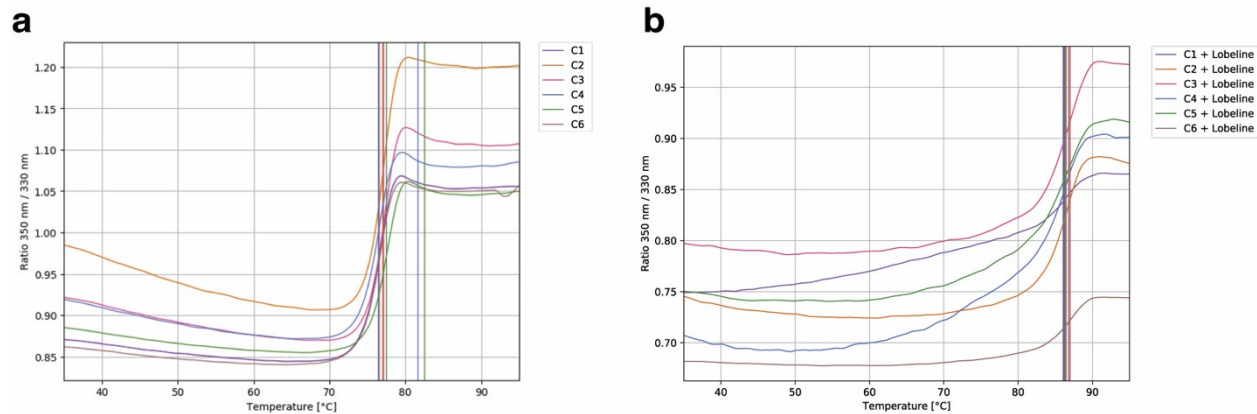

**Figure S1.** NanoDSF analysis of single cysteine mutants C1-C6 of AChBP at (a) 25  $\mu$ M, in the absence of a ligand, and (b) 1  $\mu$ M in the presence of 1 mM lobeline. Plotted as the ratio of the intrinsic fluorescence detected at 350 and 330 nm as a function of temperature. An increase in  $T_i$  (inflection temperature) indicated by the colored vertical line noted in the presence of compound.

**Table S1.** Summary of  $T_i$  observed with APO and ligand bound single cysteine AChBP mutants

|                   | Protein  | Ti#1 | Ti#2 | Protein + Lig          | Ti#1 |
|-------------------|----------|------|------|------------------------|------|
| <b>Reference:</b> | AChBP Wt | 77.5 |      | AChBP Wt               | 77.5 |
| <b>1</b>          | C1       | 76.5 |      | <b>1</b> C1 + Lobeline | 86.2 |
| <b>2</b>          | C2       | 77.0 |      | <b>2</b> C2 + Lobeline | 86.3 |
| <b>3</b>          | C3       | 77.1 |      | <b>3</b> C3 + Lobeline | 86.8 |
| <b>4</b>          | C4       | 76.4 | 81.7 | <b>4</b> C4 + Lobeline | 86.1 |
| <b>5</b>          | C5       | 77.4 | 82.5 | <b>5</b> C5 + Lobeline | 86.5 |
| <b>6</b>          | C6       | 76.5 |      | <b>6</b> C6 + Lobeline | 87.0 |

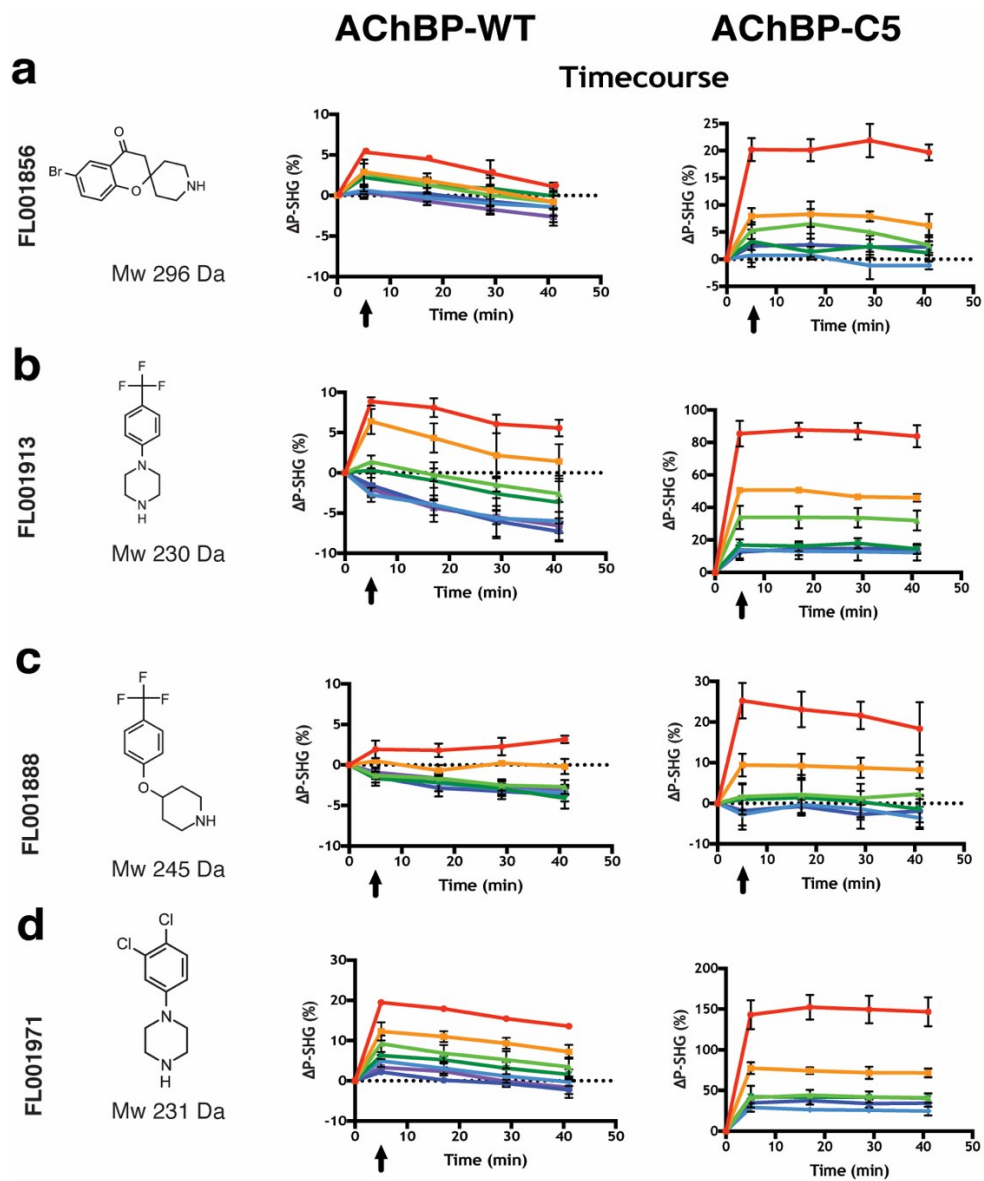

**Figure S2.** Fragments which overlapped between WT and C5 assays showing time courses reaching steady state shown at a highest concentration of 250  $\mu\text{M}$  in a two-fold concentration series in rows; (a) FL001856 (b) FL001913 (c) FL001888 (d) FL001971

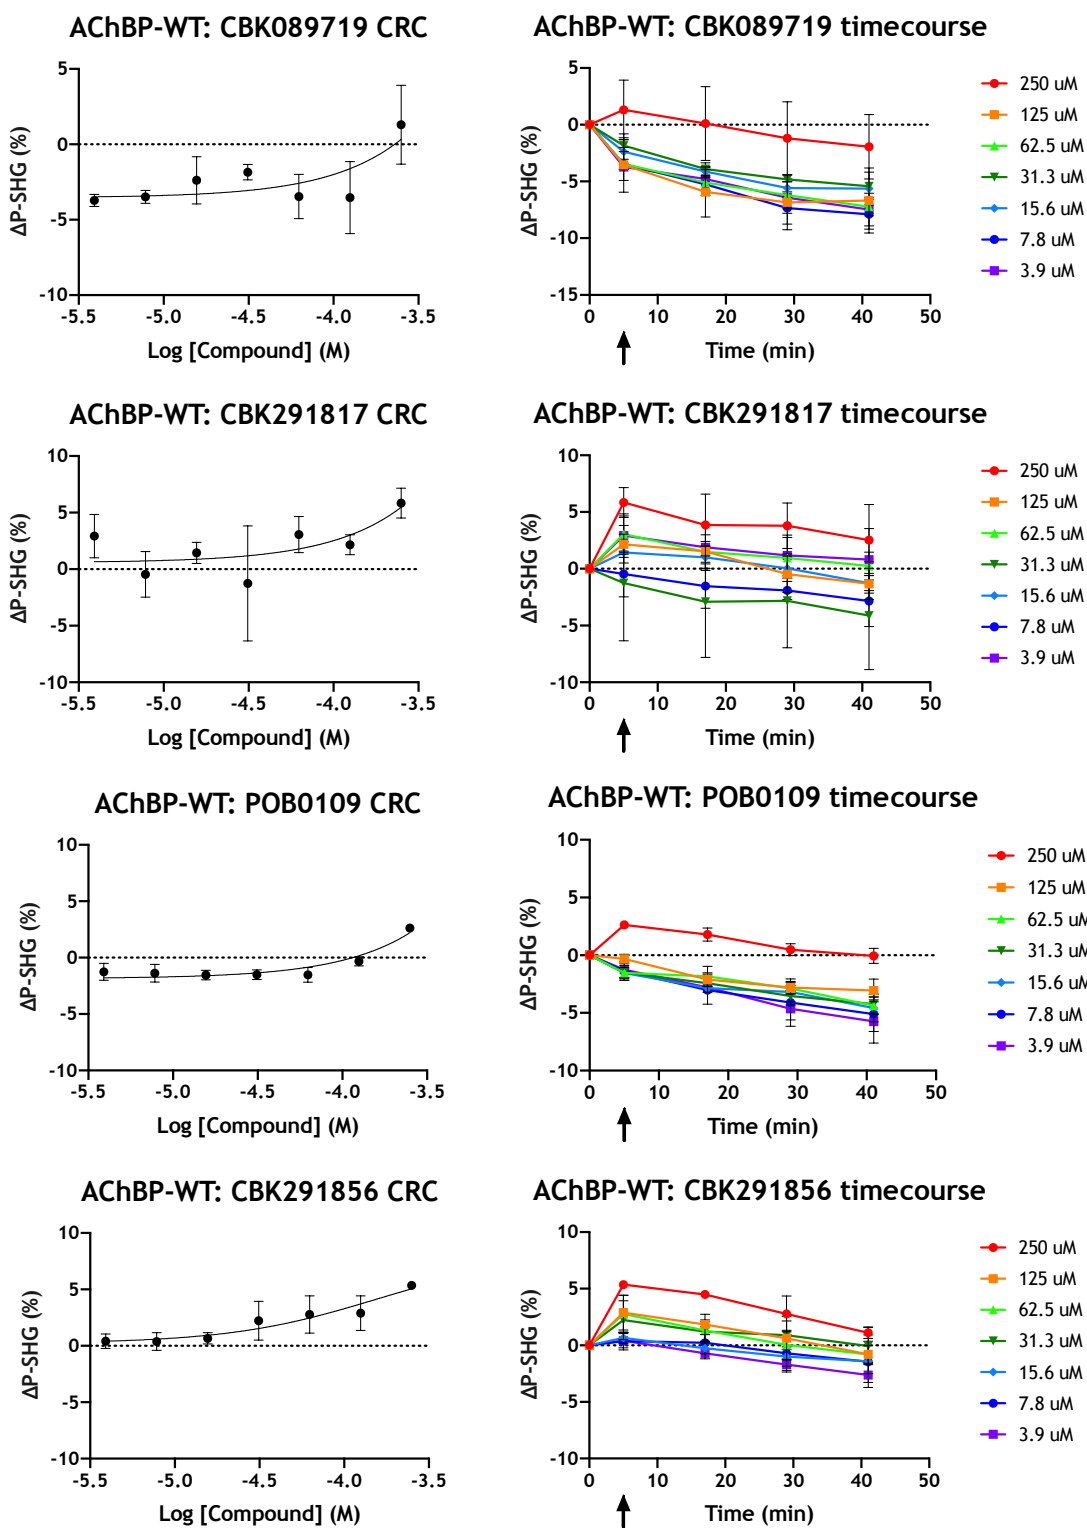

**Figure S3.** Example data-set for non-selected hits in the wild-type assay.

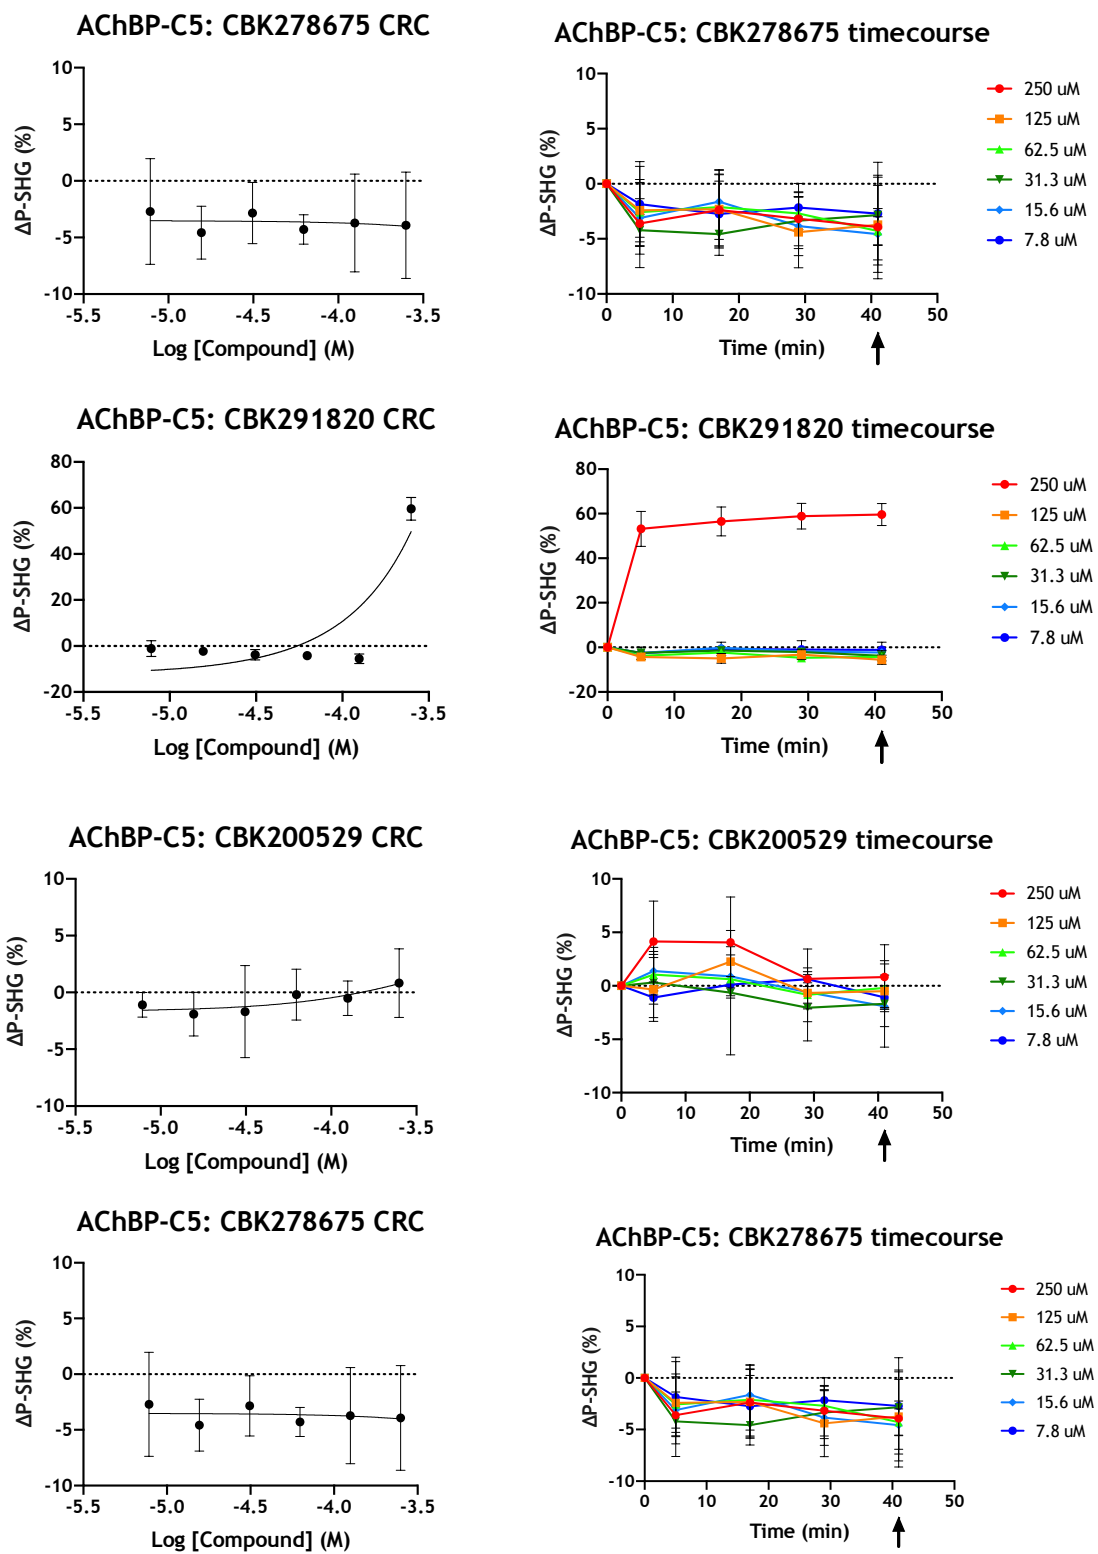

Figure S4. Example data-set for non-selected hits in the C5 assay.

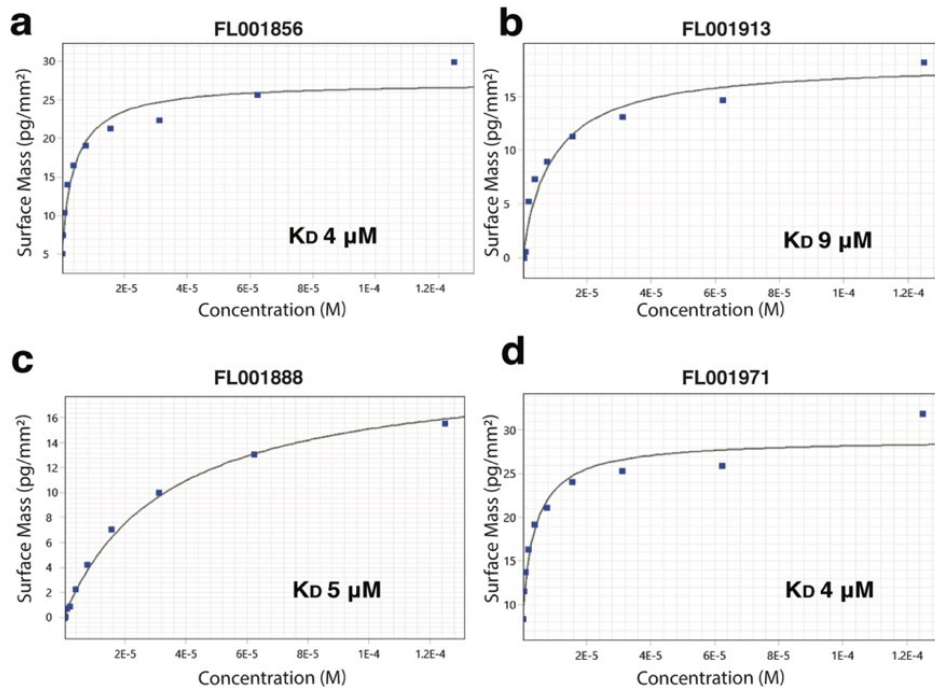

**Figure S5.** Steady state analysis of data in Figure 6 and estimation of KD values by fitting a reversible 1:1 interaction model to 10-point dose–response curves (up to 125  $\mu$ M) generated by extracting report points at steady state for each concentration. This is a less reliable procedure than the global regression analysis shown in Figure 6, considering that a more limited data set used

**Table S2:** Data collection and refinement statistics.

Values given in parentheses are for the highest resolution shell.

|                                                               | <b>AChBP + 1888</b>                           | <b>AChBP + 1856</b>                           |
|---------------------------------------------------------------|-----------------------------------------------|-----------------------------------------------|
| <b>Data collection</b>                                        |                                               |                                               |
| Beamline                                                      | BioMAX                                        | BioMAX                                        |
| Space group                                                   | P2 <sub>1</sub> 2 <sub>1</sub> 2 <sub>1</sub> | P2 <sub>1</sub> 2 <sub>1</sub> 2 <sub>1</sub> |
| Wavelength (Å)                                                | 0.9762                                        | 0.9762                                        |
| a, b, c (Å)                                                   | 76.7, 121.3, 239.3                            | 76.3, 121.0, 242.1                            |
| Resolution range (Å)                                          | 50.0-1.7 (1.8-1.7)                            | 50.0-2.0 (2.1-2.0)                            |
| Unique reflections                                            | 244709 (38136)                                | 150840 (20197)                                |
| Multiplicity                                                  | 13.7 (13.7)                                   | 13.7 (13.6)                                   |
| Completeness (%)                                              | 100.0 (100.0)                                 | 51.3 (99.1)                                   |
| R <sub>meas</sub> (%)                                         | 9.5 (304.5)                                   | 10.7 (220.6)                                  |
| Mean ( <i>I</i> )/σ( <i>I</i> )                               | 14.0 (0.9)                                    | 12.8 (1.3)                                    |
| CC(1/2)                                                       | 0.999 (0.413)                                 | 0.999 (0.529)                                 |
| Wilson B-factor (Å <sup>2</sup> )                             | 42.2                                          | 55.3                                          |
| <b>Refinement</b>                                             |                                               |                                               |
| Resolution (Å)                                                | 48.27-1.70                                    | 47.53-2.00                                    |
| R-factor                                                      | 0.2059                                        | 0.2125                                        |
| R <sub>free</sub>                                             | 0.2356                                        | 0.2432                                        |
| No. non-hydrogen atoms/ average<br>B-factor (Å <sup>2</sup> ) |                                               |                                               |
| all                                                           | 17804/42.6                                    | 16961/57.5                                    |
| H <sub>2</sub> O                                              | 1127/44.5                                     | 490/52.4                                      |
| Ligand (1888 resp. 1856)                                      | 153/50.0                                      | 136/86.6                                      |
| r.m.s.d.                                                      |                                               |                                               |
| bond lengths (Å)                                              | 0.0095                                        | 0.0084                                        |
| bond angles (°)                                               | 1.61                                          | 1.56                                          |
| Ramachandran plot, no. residues in                            |                                               |                                               |
| favored region                                                | 1991 (99.2%)                                  | 1971 (99.4%)                                  |
| allowed region                                                | 15 (0.7%)                                     | 11 (0.6%)                                     |
| outlier region                                                | 1 (0.05%)                                     | 1 (0.05%)                                     |
| PDB accession code                                            | 7NDV                                          | 7NDP                                          |
